# Supplementary material
Source: PubMed Central journal article supplement (PMC4297207)
Supplement: NIHMS638539-supplement-2.pdf [file NIHMS638539-supplement-2.pdf]

1  
2  
3  
4  
5  
6  
7  
8  
9  
10  
11  
12  
13  
14  
15  
16  
17  
18  
19  
20  
21  
22  
23  
24  
25  
26  
27  
28  
29  
30  
31  
32  
33  
34  
35  
36  
37  
38  
39  
40  
41  
42  
43  
44  
45  
46  
47  
48  
49

Appendix B. Page from the daily log used in the Lifestyle Improvement through Food and Exercise (LIFE) Study. (Include on web as supplementary material but not in print.)

| Time | Blood Sugar  | Meal                                                                               |
|------|--------------|------------------------------------------------------------------------------------|
|      | Fasting      | <b>Breakfast</b>                                                                   |
|      |              | Snack                                                                              |
|      |              | Lunch                                                                              |
|      | Before Lunch | 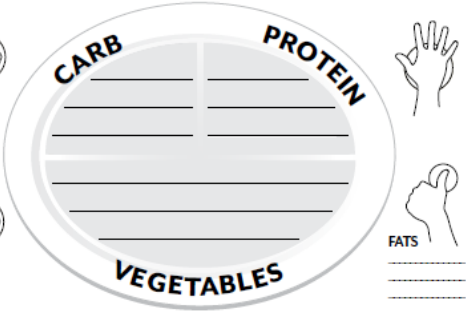 |
|      | After Lunch  |                                                                                    |
|      |              | FATS                                                                               |
|      |              | _____                                                                              |
|      |              | _____                                                                              |

  

| Time | Blood Sugar   | Meal                                                                                |
|------|---------------|-------------------------------------------------------------------------------------|
|      | Before Dinner | Snack                                                                               |
|      |               | Dinner                                                                              |
|      |               |  |
|      | After Dinner  |                                                                                     |
|      |               | Snack (optional)                                                                    |
|      |               | _____                                                                               |
|      |               | _____                                                                               |
